# Supplementary material for: The effects of probiotics supplementation on glycaemic control among adults with type 2 diabetes mellitus: a systematic review and meta-analysis of randomised clinical trials
Source: Springer Nature journal article supplement (doi:10.1186/s12967-023-04306-0), 2023-07-06
Supplement: MOESM3 [file 25582608]

a

|                         |   |   |   |   |   |   |
|-------------------------|---|---|---|---|---|---|
| Asemi 2013              | ? | ? | ? | ? | ? | ? |
| Bayat 2016              | ? | ? | ? | ? | ? | ? |
| Ejlalshah 2012          | ? | ? | ? | ? | ? | ? |
| Feizollahzadeh 2017     | ? | ? | ? | ? | ? | ? |
| Firouzi 2017            | ? | ? | ? | ? | ? | ? |
| Hosseinzadeh 2013       | ? | ? | ? | ? | ? | ? |
| Hove 2015               | ? | ? | ? | ? | ? | ? |
| Hsieh 2018              | ? | ? | ? | ? | ? | ? |
| Jiang 2020              | ? | ? | ? | ? | ? | ? |
| Judiono 2014            | ? | ? | ? | ? | ? | ? |
| Jung 2014               | ? | ? | ? | ? | ? | ? |
| Khalili 2019            | ? | ? | ? | ? | ? | ? |
| Kobylak 2018            | ? | ? | ? | ? | ? | ? |
| Kobylak 2018            | ? | ? | ? | ? | ? | ? |
| Ismail 2020             | ? | ? | ? | ? | ? | ? |
| Madempudi 2019          | ? | ? | ? | ? | ? | ? |
| Mazloom 2013            | ? | ? | ? | ? | ? | ? |
| Mobini 2017             | ? | ? | ? | ? | ? | ? |
| Mohammadshahi 2014      | ? | ? | ? | ? | ? | ? |
| Ostadrathini 2015       | ? | ? | ? | ? | ? | ? |
| Palacios 2020           | ? | ? | ? | ? | ? | ? |
| Raygan 2018             | ? | ? | ? | ? | ? | ? |
| Razmpoosh 2019          | ? | ? | ? | ? | ? | ? |
| Sabico 2019             | ? | ? | ? | ? | ? | ? |
| Sato 2017               | ? | ? | ? | ? | ? | ? |
| Shakeri 2014            | ? | ? | ? | ? | ? | ? |
| Tajaddadi-Ebrahimi 2014 | ? | ? | ? | ? | ? | ? |
| Tipici 2020             | ? | ? | ? | ? | ? | ? |
| Toejing 2021            | ? | ? | ? | ? | ? | ? |
| Touucci 2017            | ? | ? | ? | ? | ? | ? |
| Zhang 2022              | ? | ? | ? | ? | ? | ? |

Random sequence generation (selection bias)  
 Allocation concealment (selection bias)  
 Blinding of participants and personnel (performance bias)  
 Blinding of outcome assessment (detection bias)  
 Incomplete outcome data (attrition bias)  
 Selective reporting (reporting bias)  
 Other bias

b

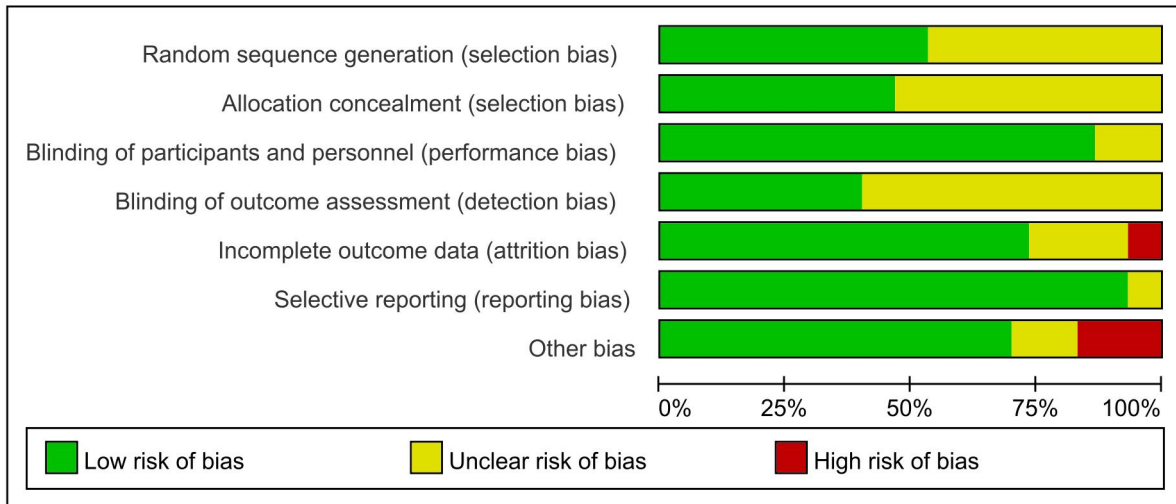

Supplementary figure S1 (a) risk of bias summary and (b) risk of bias graph
