# Supplementary material for: The effects of probiotics supplementation on glycaemic control among adults with type 2 diabetes mellitus: a systematic review and meta-analysis of randomised clinical trials
Source: Springer Nature journal article supplement (doi:10.1186/s12967-023-04306-0), 2023-07-06
Supplement: MOESM4 [file 25582608]

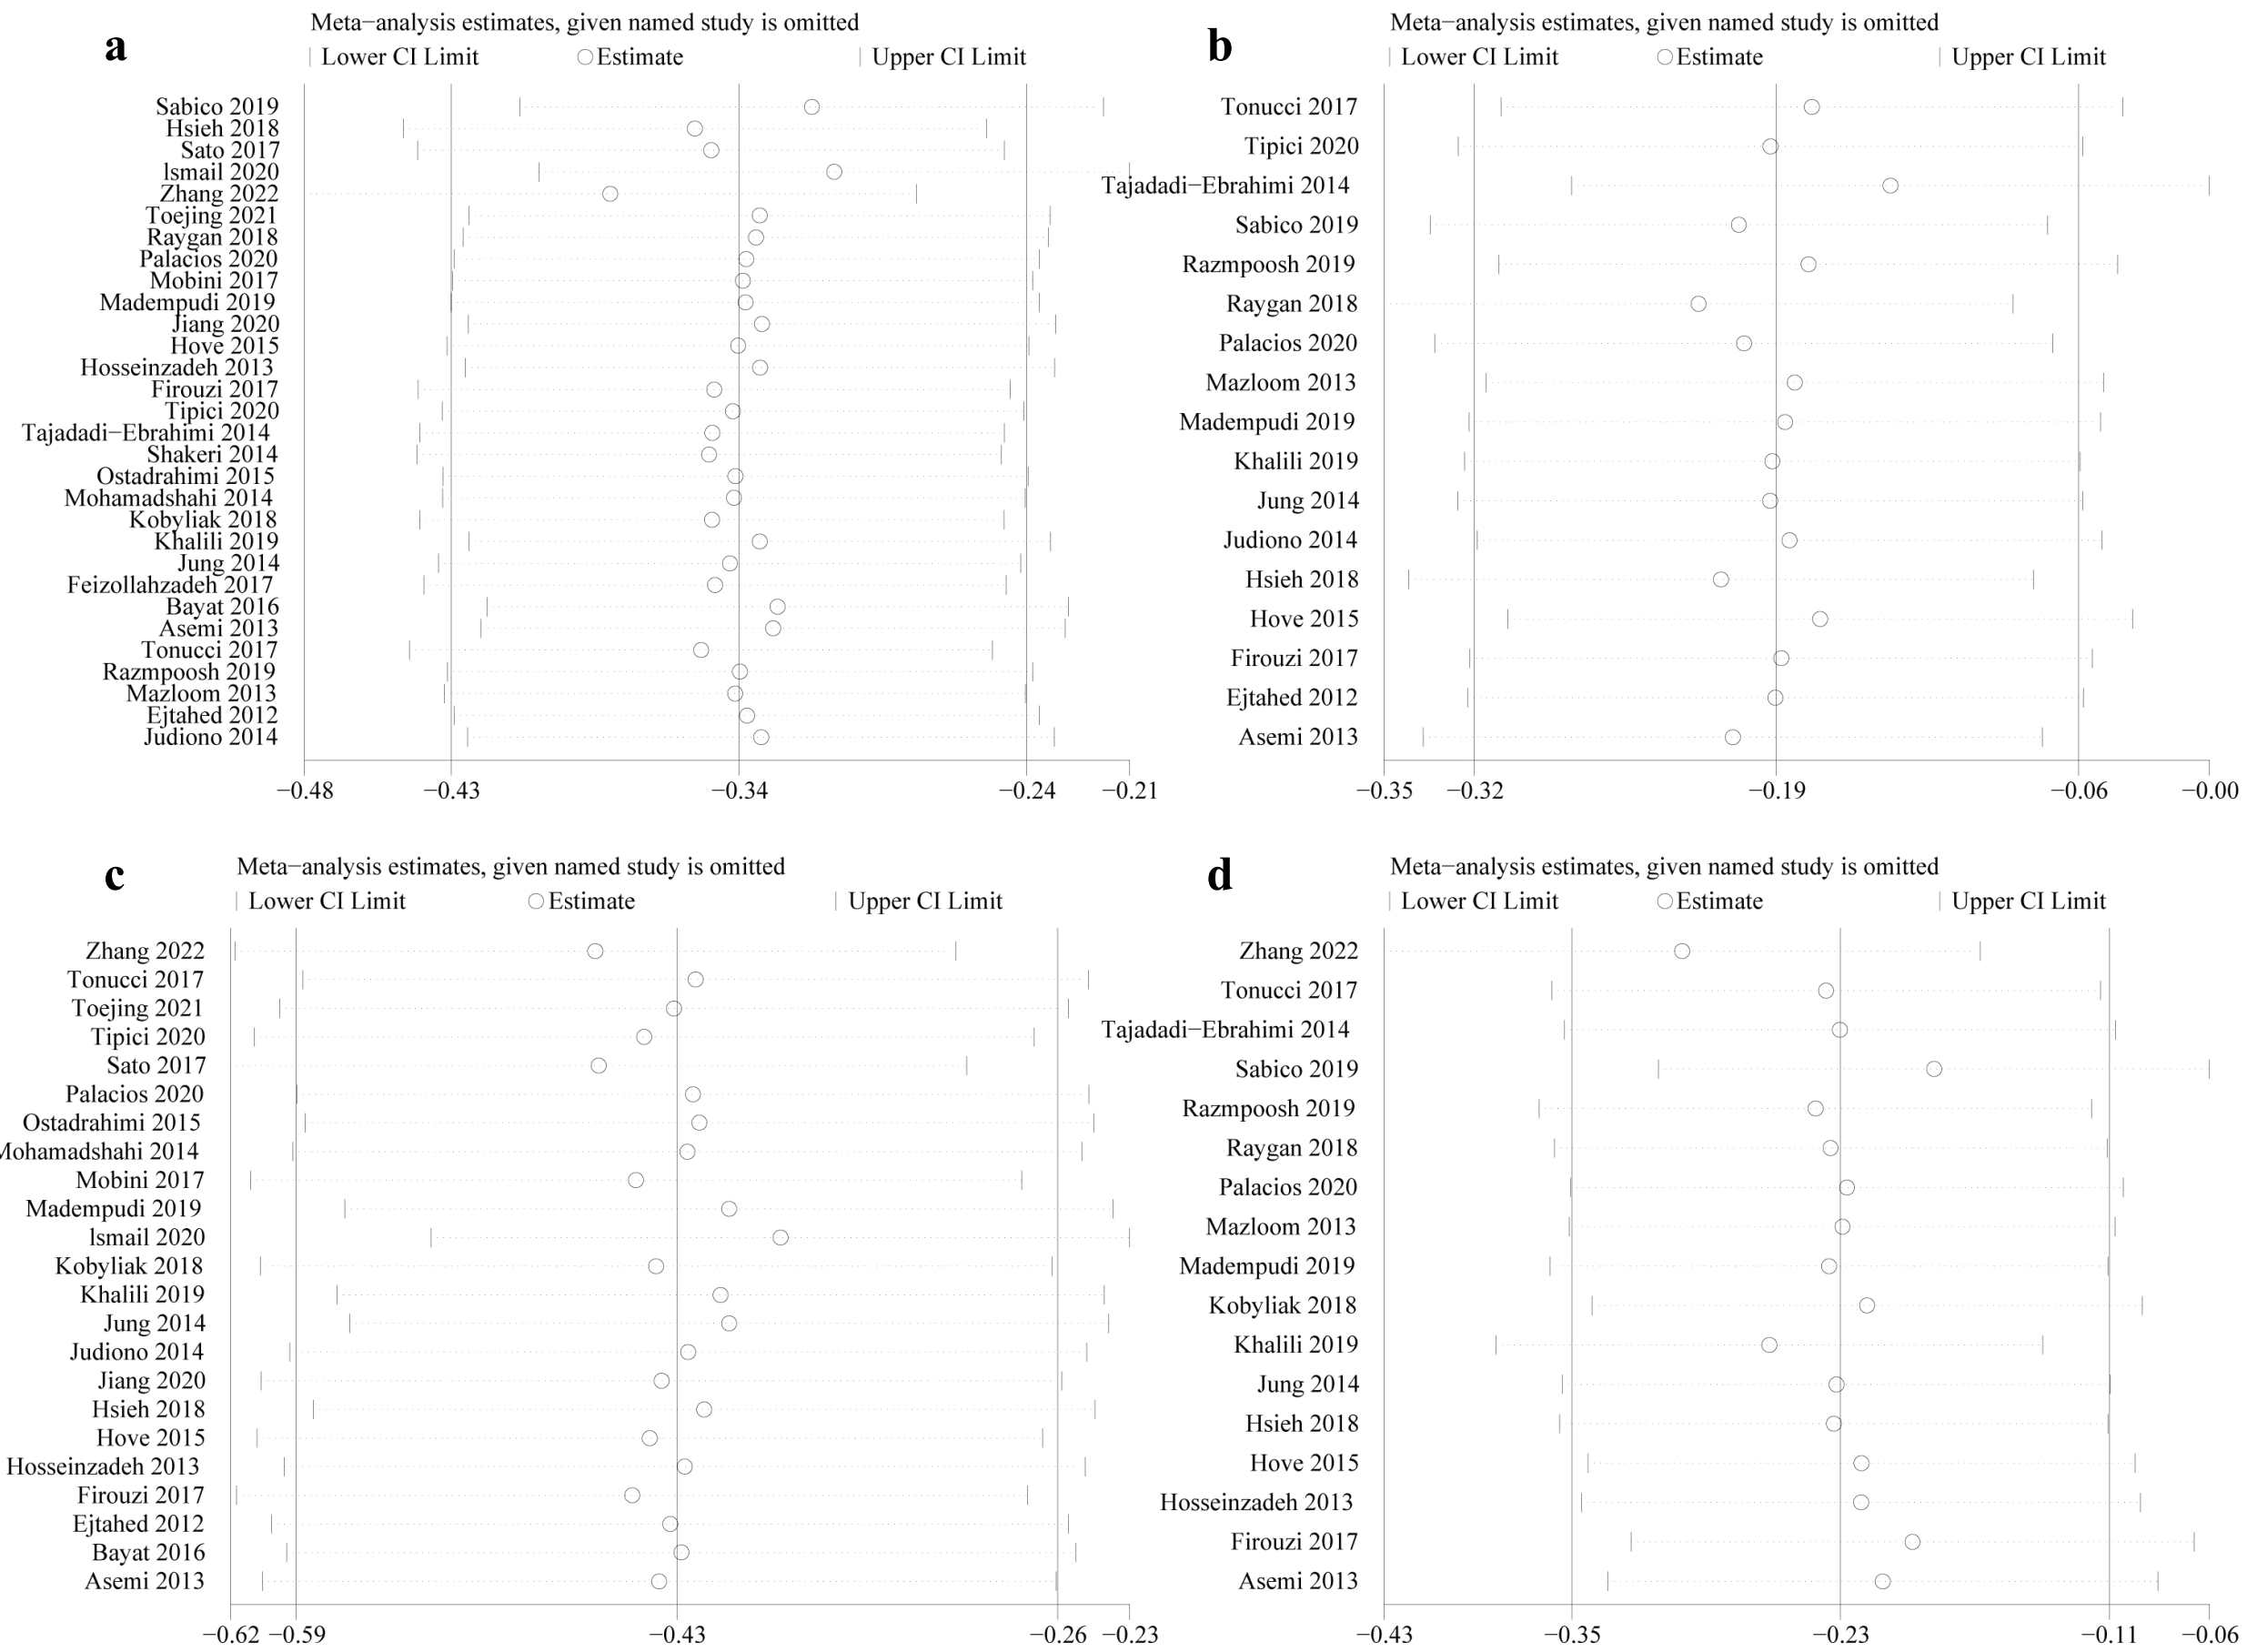

**Supplementary figure S2 Sensitivity analysis for studies included in this meta-analysis. (a) FBG, (b) Insulin, (c) HbAc1, and (d) HOMA-IR.**
